# Supplementary material for: The MapZ-Mediated Methylation of Chemoreceptors Contributes to Pathogenicity of Pseudomonas aeruginosa
Source: PubMed Central journal article supplement (PMC6370697; doi:10.3389/fmicb.2019.00067), 2019-02-05
Supplement: Data_Sheet_1.pdf [file Data_Sheet_1.pdf]

# Supplementary Materials

## The MapZ-mediated Methylation of Chemoreceptors Contributes to Pathogenicity of *Pseudomonas aeruginosa*

Shuo Sheng<sup>1,5</sup>, Lingyi Xin<sup>2</sup>, Joey Kuok Hoong Yam<sup>2,3,4</sup>, May Margarete Salido<sup>2,3,4</sup>, Nicole Zi Jia Khong<sup>2</sup>, Qiong Liu<sup>1,5</sup>, Rachel Andrea Chea<sup>2</sup>, Hoi Yeung Li<sup>2</sup>, Liang Yang<sup>2,3,4</sup>, Zhao-Xun Liang<sup>2,4\*</sup>, Linghui Xu<sup>1, 6\*</sup>

### 1 Supplementary Movies, Tables and Figures.

#### 1.1 Supplementary Movies

**Supplementary Movie S1.** The migration of PAO1 towards wounded A549 cells.

**Supplementary Movie S2.** The migration of PAO1/pMapZ towards wounded A549 cells.

**Supplementary Movie S3.** The migration of  $\Delta cheR1/p$  towards wounded A549 cells.

## **1.2 Supplementary Tables**

**Supplementary Table S1**

**Supplementary Table S2**

## **1.3 Supplementary Figures**

**Supplementary Figure S1**

**Supplementary Figure S2**

Table S1. Bacterial strains and plasmids

| Strain or plasmid                                                                 | Relevant genotype or description                                                            | Reference(s) or source |
|-----------------------------------------------------------------------------------|---------------------------------------------------------------------------------------------|------------------------|
| <b><i>Escherichia coli</i></b>                                                    |                                                                                             |                        |
| <i>E. coli</i> BL21 (DE3)                                                         | Cells for high level expression of heterologous proteins in <i>E. coli</i>                  | Stratagene             |
| <i>E. coli</i> HCB721                                                             | Cells for expression of <i>P. aeruginosa</i> chemoreceptors                                 | (Wolfe et al., 1988)   |
| <i>E. coli</i> DH5 $\alpha$                                                       | Cells for heat shock transformation                                                         | Transgen biotech       |
| <i>E. coli</i> OP50                                                               | The food source used for <i>C. elegans</i> in fast-killing assay                            | Lab stock              |
| <b><i>Pseudomonas aeruginosa</i></b>                                              |                                                                                             |                        |
| PA01                                                                              | Wild type                                                                                   | (Jacobs et al., 2003)  |
| PA01/p                                                                            | PA01 strain containing pUCP18, Car <sup>r</sup>                                             | This study             |
| PA01/pMapZ                                                                        | PA01 strain containing pUCP18-MapZ, Car <sup>r</sup>                                        | This study             |
| <i>mapZ_R13A</i> strain containing pUCP18, Car <sup>r</sup> $\Delta$ <i>cheR1</i> | PA3348 transposon mutant PW6640 from the Washington Genome Center PA01 mutant library       | (Jacobs et al., 2003)  |
| $\Delta$ <i>cheR1</i> /p                                                          | $\Delta$ <i>cheR1</i> strain containing pUCP18, Car <sup>r</sup>                            | This study             |
| <i>cheR1</i> <sup>D144AY222A</sup>                                                | PA01 strain containing D144A and Y222A mutation of PA3348 in genome                         | This study             |
| <i>cheR1</i> <sup>D144AY222A</sup> /p                                             | <i>cheR1</i> <sup>D144AY222A</sup> strain containing pUCP18, Car <sup>r</sup>               | This study             |
| $\Delta$ <i>ctpH</i>                                                              | PA2561 transposon mutant PW5300 from the Washington Genome Center PA01 mutant library       | (Jacobs et al., 2003)  |
| $\Delta$ <i>ctpH</i> /p                                                           | $\Delta$ <i>ctpH</i> strain containing pUCP18, Car <sup>r</sup>                             | This study             |
| $\Delta$ <i>ctpM</i>                                                              | PA2652 transposon mutant PW5440 from the Washington Genome Center PA01 mutant library       | (Jacobs et al., 2003)  |
| $\Delta$ <i>ctpM</i> /p                                                           | $\Delta$ <i>ctpM</i> strain containing pUCP18, Car <sup>r</sup>                             | This study             |
| $\Delta$ <i>aer</i>                                                               | PA1561 transposon mutant PW3811 from the Washington Genome Center PA01 mutant library       | (Jacobs et al., 2003)  |
| $\Delta$ <i>aer</i> /p                                                            | $\Delta$ <i>aer</i> strain containing pUCP18, Car <sup>r</sup>                              | This study             |
| <b>Plasmids</b>                                                                   |                                                                                             |                        |
| pUCP18                                                                            | <i>E. coli</i> - <i>P. aeruginosa</i> expression vector, Amp <sup>r</sup>                   | Lab stock              |
| pHSe5-PctA                                                                        | PA4309 gene with stop codon cloned into pHSe5 vector, inducible with IPTG, Amp <sup>r</sup> | (Schmidt et al., 2011) |
| pHSe5-PctB                                                                        | PA4310 gene with stop codon cloned into pHSe5 vector, inducible with IPTG, Amp <sup>r</sup> | This study             |
| pHSe5-PctC                                                                        | PA4307 gene with stop codon cloned into pHSe5 vector, inducible with IPTG, Amp <sup>r</sup> | This study             |
| pHSe5-CtpL                                                                        | PA4844 gene with stop codon cloned into pHSe5 vector, inducible with IPTG, Amp <sup>r</sup> | This study             |
| pHSe5-Aer                                                                         | PA1561 gene with stop codon cloned into pHSe5 vector, inducible with IPTG, Amp <sup>r</sup> | This study             |
| pHSe5-CtpH                                                                        | PA2561 gene with stop codon cloned into pHSe5 vector, inducible with IPTG, Amp <sup>r</sup> | This study             |
| pHSe5-PA0411                                                                      | PA0411 gene with stop codon cloned into pHSe5 vector, inducible with IPTG, Amp <sup>r</sup> | This study             |
| pHSe5-WspA                                                                        | PA3708 gene with stop codon cloned into pHSe5 vector, inducible with IPTG, Amp <sup>r</sup> | This study             |
| pHSe5-CtpP                                                                        | PA0180 gene with stop codon cloned into pHSe5 vector, inducible with IPTG, Amp <sup>r</sup> | This study             |
| pHSe5-TlpQ                                                                        | PA2654 gene with stop codon cloned into pHSe5 vector, inducible with IPTG, Amp <sup>r</sup> | This study             |
| pHSe5-CtpM                                                                        | PA2652 gene with stop codon cloned into pHSe5 vector, inducible with IPTG, Amp <sup>r</sup> | This study             |
| pHSe5-PA4520                                                                      | PA4520 gene with stop codon cloned into pHSe5 vector, inducible with IPTG, Amp <sup>r</sup> | This study             |

|              |                                                                                             |            |
|--------------|---------------------------------------------------------------------------------------------|------------|
| pHSe5-PA2788 | PA2788 gene with stop codon cloned into pHSe5 vector, inducible with IPTG, Amp <sup>r</sup> | This study |
| pHSe5-PA2867 | PA2867 gene with stop codon cloned into pHSe5 vector, inducible with IPTG, Amp <sup>r</sup> | This study |
| pHSe5-PA2920 | PA2920 gene with stop codon cloned into pHSe5 vector, inducible with IPTG, Amp <sup>r</sup> | This study |
| pHSe5-PA1608 | PA1608 gene with stop codon cloned into pHSe5 vector, inducible with IPTG, Amp <sup>r</sup> | This study |
| pHSe5-PA4915 | PA4915 gene with stop codon cloned into pHSe5 vector, inducible with IPTG, Amp <sup>r</sup> | This study |
| pHSe5-PA4290 | PA4290 gene with stop codon cloned into pHSe5 vector, inducible with IPTG, Amp <sup>r</sup> | This study |
| pHSe5-PA1251 | PA1251 gene with stop codon cloned into pHSe5 vector, inducible with IPTG, Amp <sup>r</sup> | This study |
| pHSe5-McpK   | PA5072 gene with stop codon cloned into pHSe5 vector, inducible with IPTG, Amp <sup>r</sup> | This study |
| pHSe5-PA4633 | PA4633 gene with stop codon cloned into pHSe5 vector, inducible with IPTG, Amp <sup>r</sup> | This study |
| pHSe5-PA2573 | PA2573 gene with stop codon cloned into pHSe5 vector, inducible with IPTG, Amp <sup>r</sup> | This study |
| pHSe5-PA1646 | PA1646 gene with stop codon cloned into pHSe5 vector, inducible with IPTG, Amp <sup>r</sup> | This study |

Table S2. Primers used in this study

| Primers  | Sequence (5'-3')                          | Purpose                          |
|----------|-------------------------------------------|----------------------------------|
| pctC-F   | CGCGGATCCATGCTTCGCTCGCTGTCGTTTG           | For construction of pHSe5-PctC   |
| pctC-R   | CCCAAGCTTTTCAGATCTTGAAGCTGTCCACC          | For construction of pHSe5-PctC   |
| pctB-F   | CAATTTACACAGGAAACAGATGATCAAAAAGTCTCAAGTTC | For construction of pHSe5-PctB   |
| pctB-R   | TTGACAGCTTATCATCGATATCAGATCTTGAAGCTGTC    | For construction of pHSe5-PctB   |
| ctpL-F   | CGCGGATCCATGCGCCTCAAGCAACTCACCA           | For construction of pHSe5-PA4844 |
| ctpL-R   | CCCAAGCTTTTCACAGGCGGAAGGCCTGCACC          | For construction of pHSe5-PA4844 |
| Aer-F    | CGCGGATCCATGCGCAACAATCAGCCCATCA           | For construction of pHSe5-PA1561 |
| Aer-R    | CCCAAGCTTTTCAGCGGTTGAAGCGCTCGACC          | For construction of pHSe5-PA1561 |
| ctpH-F   | CGCGGATCCATGCCCCGCTCGCCGGGCCACA           | For construction of pHSe5-CTPH   |
| ctpH-R   | CCCAAGCTTTTCAGGCCCGCAGGCGTTGCAGG          | For construction of pHSe5-CTPH   |
| PA0411-F | CGCGGATCCATGAAGAAAATCAACGCAGGCA           | For construction of pHSe5-PA0411 |
| PA0411-R | CCCAAGCTTTTCAGGCCTGCTCCACGCCCTCC          | For construction of pHSe5-PA0411 |
| wspA-F   | CGCGGATCCGTGAAGAACTGGACTGTTTCGCC          | For construction of pHSe5-PA3708 |
| wspA-R   | CCCAAGCTTTTCAGACTTTGAAGCGGGATACG          | For construction of pHSe5-PA3708 |
| cttP-F   | CGCGGATCCATGCGCGAGTCCCTCGGTGTTT           | For construction of pHSe5-PA0180 |
| cttP-R   | CCCAAGCTTTTCAGAACAATTCCACTTCGCCC          | For construction of pHSe5-PA0180 |
| tlpQ-F   | CAATTTACACAGGAAACAGATGTTTCCTTCGCCGCTG     | For construction of pHSe5-PA2654 |
| tlpQ-R   | TTGACAGCTTATCATCGATATCAGGCCTTGAAGTGA      | For construction of pHSe5-       |

|          |                                         |                                          |
|----------|-----------------------------------------|------------------------------------------|
| ctpM-F   | TTCC<br>CGCGGATCCATGATGCGTCTGACCCTGAAAT | PA2654<br>For construction of pHSe5-CTPM |
| ctpM-R   | CCCAAGCTTTCAGATGCGGAACTGACCGACC         | For construction of pHSe5-CTPM           |
| PA4520-F | CGCGGATCCGTGAAGACCGTACTCTATCCCG         | For construction of pHSe5-PA4520         |
| PA4520-R | CCCAAGCTTCTACACCCGGAACGCGCCGATC         | For construction of pHSe5-PA4520         |
| PA2788-F | CGCGGATCCATGAACGAAAGCGTCGCCAGGG         | For construction of pHSe5-PA2788         |
| PA2788-R | CCCAAGCTTTCAGGTACGGAAGCGGCCGAGC         | For construction of pHSe5-PA2788         |
| PA2867-F | CGCGGATCCATGGGCACCTGGATCAGCGACA         | For construction of pHSe5-PA2867         |
| PA2867-R | CCCAAGCTTTCAGAGGCGTAGCTGGCCGATG         | For construction of pHSe5-PA2867         |
| PA2920-F | CGCGGATCCATGCTGCAATGGTTCGCTAACC         | For construction of pHSe5-PA2920         |
| PA2920-R | CCCAAGCTTTCAGACGCGGAAACGGCCGACC         | For construction of pHSe5-PA2920         |
| PA1608-F | CGCGGATCCATGTCTTTGCGCAGTATGCCCA         | For construction of pHSe5-PA1608         |
| PA1608-R | CCCAAGCTTTCAGACGACGAAGCGGGTGACC         | For construction of pHSe5-PA1608         |
| PA4915-F | CGCGGATCCATGCTCACTGGCGTCACGGTTC         | For construction of pHSe5-PA4915         |
| PA4915-R | CCCAAGCTTCTAGACGGTGAAGCGCTGGATC         | For construction of pHSe5-PA4915         |
| PA4290-F | CGCGGATCCATGCAGCCCGCTCGTTCCCGCA         | For construction of pHSe5-PA4290         |
| PA4290-R | CCCAAGCTTCTAGCCGTTCAAGGCCAGGCTC         | For construction of pHSe5-PA4290         |
| PA1251-F | CGCGGATCCATGCTTCTTCGTCGTATCGCCA         | For construction of pHSe5-PA1251         |
| PA1251-R | CCCAAGCTTTCAGACCACGAAGCGACCGATC         | For construction of pHSe5-PA1251         |
| mcpK-F   | CGCGGATCCATGTACGATTGGTGGGTTCTCC         | For construction of pHSe5-PA5072         |
| mcpK-R   | CCCAAGCTTTTACAGGCGGAAGCGTCCCACC         | For construction of pHSe5-PA5072         |
| PA4633-F | CGCGGATCCATGAAGCTCAAGTCGATCCAGT         | For construction of pHSe5-PA4633         |
| PA4633-R | CCCAAGCTTCTAGACCCTGAACTGATTCACC         | For construction of pHSe5-PA4633         |
| PA2573-F | CGCGGATCCATGAACATTCGGCAGAGAATCC         | For construction of pHSe5-PA2573         |
| PA2573-R | CCCAAGCTTTCAGATCTTGAAGCGCTCCACC         | For construction of pHSe5-PA2573         |
| PA1646-F | CGCGGATCCATGCTGGGGTTGCTGCGCAGGC         | For construction of pHSe5-PA1646         |
| PA1646-R | CCCAAGCTTCTACAAGCGGAAATGCCTGACC         | For construction of pHSe5-PA1646         |
| pHSe5-F  | CTGTTGACAATTAATCATCG                    | Detection primer of pHSe5                |
| pHSe5-R  | CTTTCGTCTTCAAGCAGATC                    | Detection primer of pHSe5                |

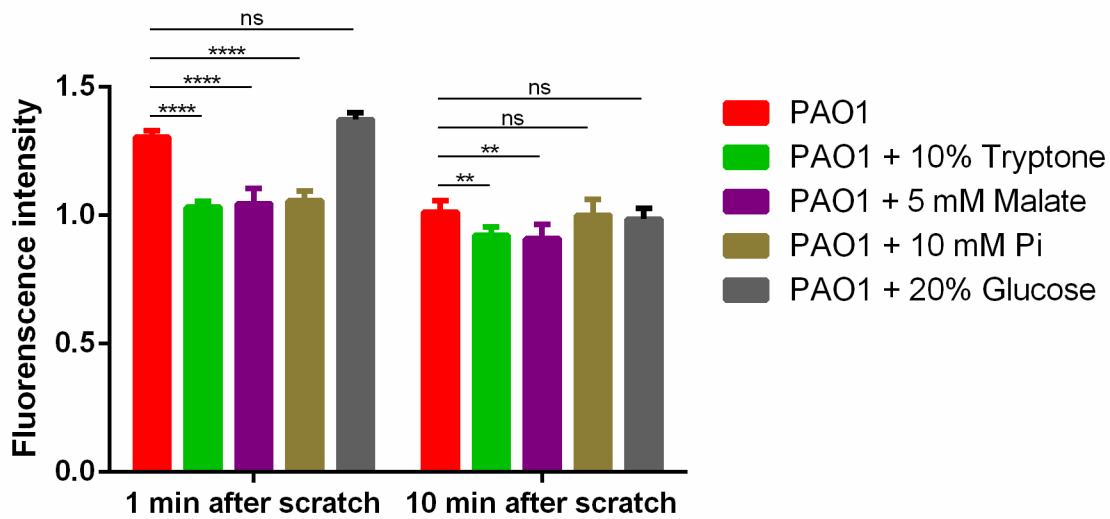

**Figure S1. Chemotaxis-guided migration of *P. aeruginosa* strain PAO1 towards scratch-wounded A549 human cells in the presence of different chemoattractants.** Quantitative comparison of the accumulation of *P. aeruginosa* cells around the injured A549 cells as indicated by fluorescence intensity. Three independent experiments were performed on each strain and at least 10 cells from each strain were used for quantitative analysis (Data are mean  $\pm$  SD (n>10)).

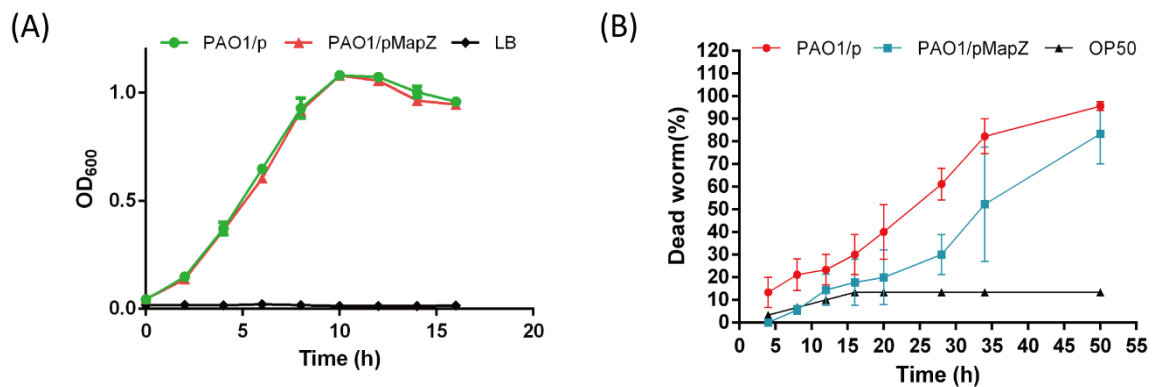

**Figure S2. Overexpression of MapZ attenuated virulence in fast killing of the nematode *C. elegans*.** (A) Growth curves of *P. aeruginosa* PAO1 and MapZ overexpression mutant in LB medium. The data are presented as the means  $\pm$  standard errors from three independent experiments. (B) Overexpression of MapZ negatively impact virulence in fast-killing *C. elegans*. The data are presented as the means  $\pm$  standard errors from three independent experiments.
